# Supplementary material for: Cyclosporine A reduces microvascular obstruction and preserves left ventricular function deterioration following myocardial ischemia and reperfusion
Source: Springer Nature journal article supplement (doi:10.1007/s00395-015-0475-8), 2015-02-26
Supplement: MOESM1 [file 8395000]

Online Resource 1. The comparison of the area at risk and left ventricular ejection fraction in both stages of the study.

| Study group                                                    | Baseline experiments |          |          |                                                  | Additional experiments |          |                             |
|----------------------------------------------------------------|----------------------|----------|----------|--------------------------------------------------|------------------------|----------|-----------------------------|
|                                                                | CsA                  | PoC      | Con      | <i>P</i> -value of ANOVA for CsA vs. PoC vs. Con | CsA                    | Con      | <i>P</i> -value CsA vs. Con |
| Area at risk, %*                                               | 50.2±1.6             | 49.8±1.9 | 49.4±2.6 | 0.77                                             | 48.3±1.5               | 47.7±1.9 | 0.50                        |
| Left ventricular ejection fraction at 3h of reperfusion, % *** | 46.3±3.5**           | 42.9±5.9 | 38.9±5.6 | 0.036                                            | 44.1±2.9               | 36.3±3.7 | <0.001                      |

Abbreviations: Con: control group, PoC: postconditioning group, CsA: cyclosporine A group.

\* At baseline determined by Evans blue staining as percentage of left ventricle, in additional experiments by T2-weighted myocardial edema in cardiac magnetic resonance imaging as percentage of left ventricle.

\*\* *P*=0.005 by post-hoc test versus control group.

\*\*\* *P*=0.35 for differences between baseline and additional experiments in terms of treatment effect associated with cyclosporine A infusion.
