# Supplementary material for: Cyclosporine A reduces microvascular obstruction and preserves left ventricular function deterioration following myocardial ischemia and reperfusion
Source: Springer Nature journal article supplement (doi:10.1007/s00395-015-0475-8), 2015-02-26
Supplement: MOESM2 [file 8395000]

Online resource 2. Microscopic characteristics of compared groups.

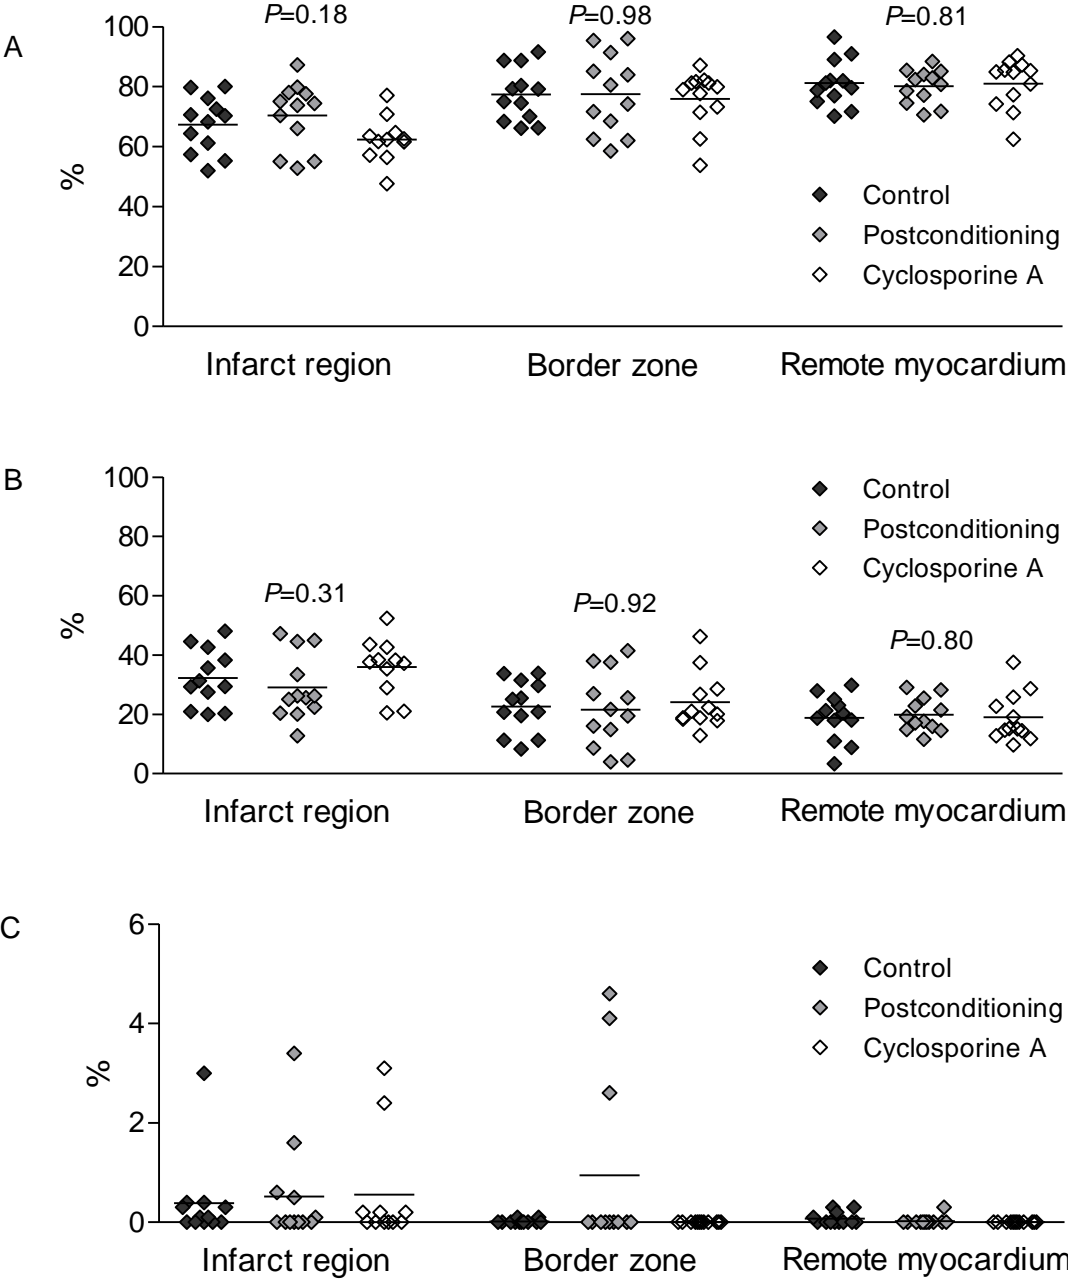

Abbreviations: data are shown as mean and absolute values. A. Cardiac myocytes, B. Interstitial space, C. Area occupied by erythrocytes.
